# Supplementary material for: A fluorescent bis(benzoxazole) ligand: Toward binuclear Zn(II)–Zn(ii) assembly
Source: Royal Society of Chemistry journal article supplement (doi:10.1039/c000989j), 2010-01-01
Supplement: c000989j.pdf [file c000989j.pdf]

## A Fluorescent Bis(benzoxazole) Ligand: Toward Binuclear Zn(II)-Zn(II) Assembly

Qinghui Chu, Doug A. Medvetz and Yi Pang\*

Department of Chemistry & Maurice Morton Institute of Polymer Science  
The University of Akron, Akron, OH 44325

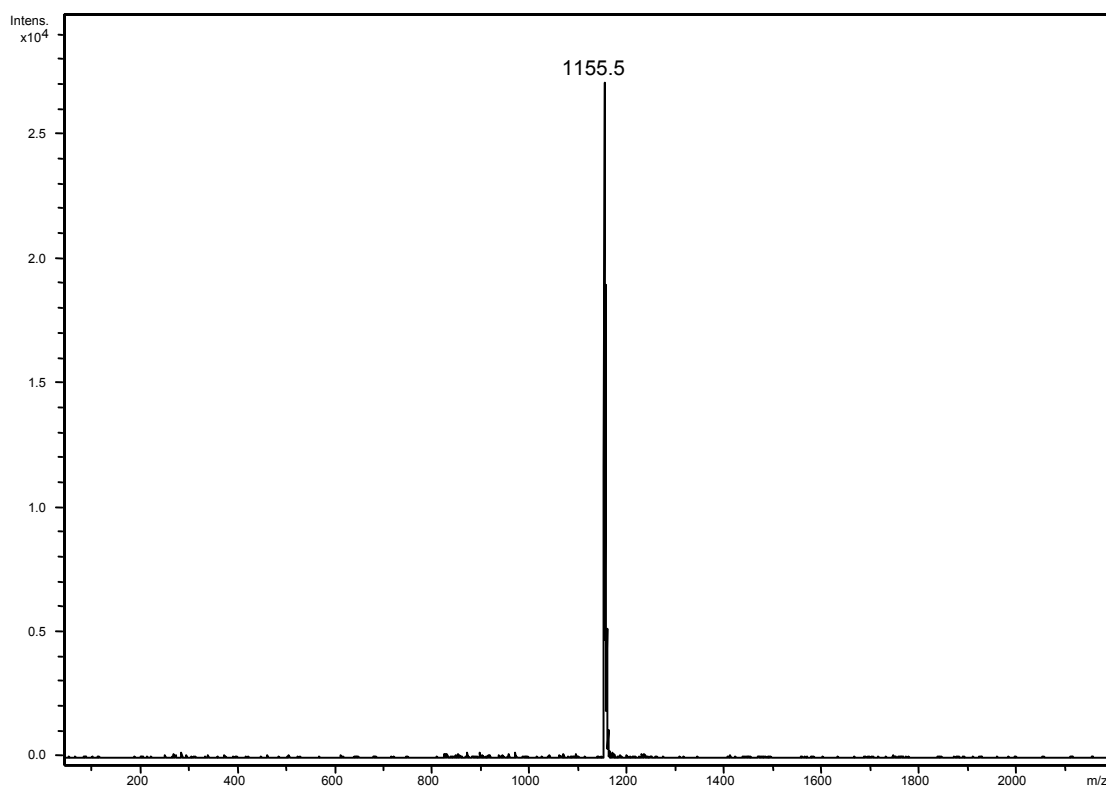

Figure S1. ESI-MS spectra of **5** detected the mass of  $Zn_2L_3$  at 1155 without finding  $Zn_2L_4$  at 1496.

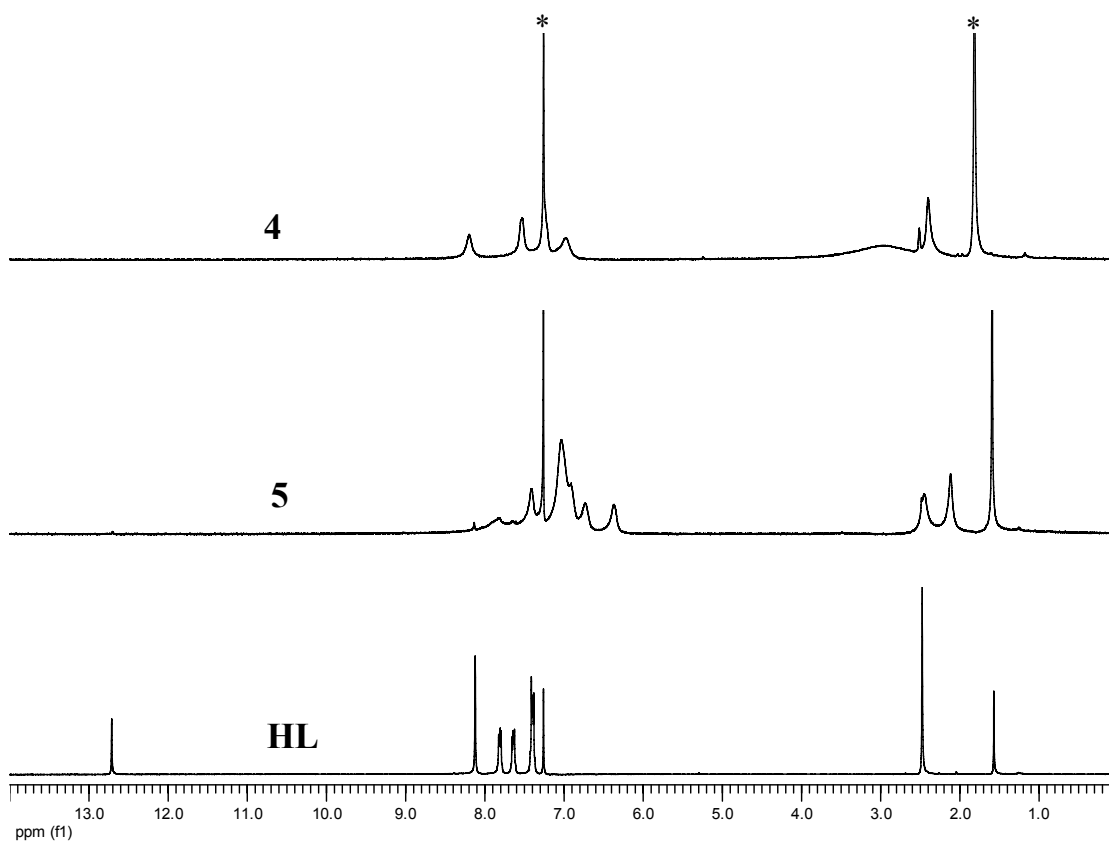

Figure S2. The NMR spectra of ligand (bottom) and complexes **4** and **5**. The starred (\*) signals at 7.25 and 1.5 ppm are attributed to solvent CHCl<sub>3</sub> and water, respectively.

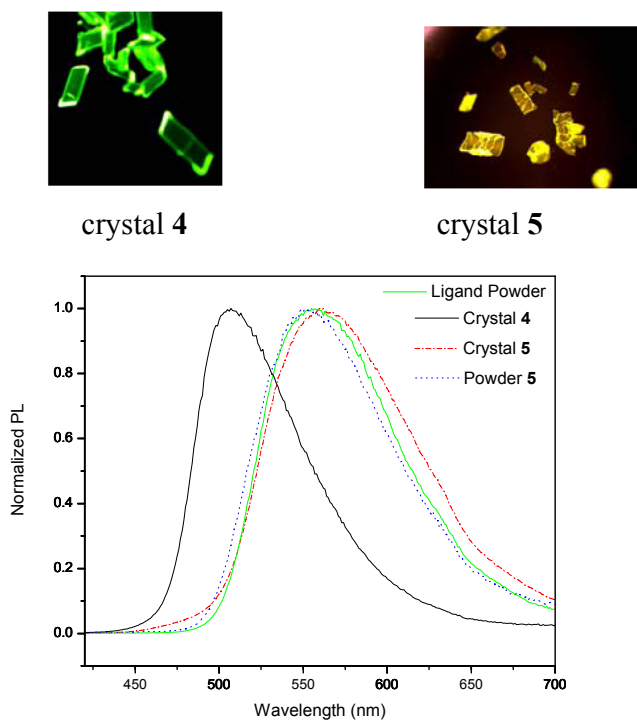

Figure S3. Images of fluorescent crystals **4** and **5** when excited with blue light (top); and their emission spectra (bottom).

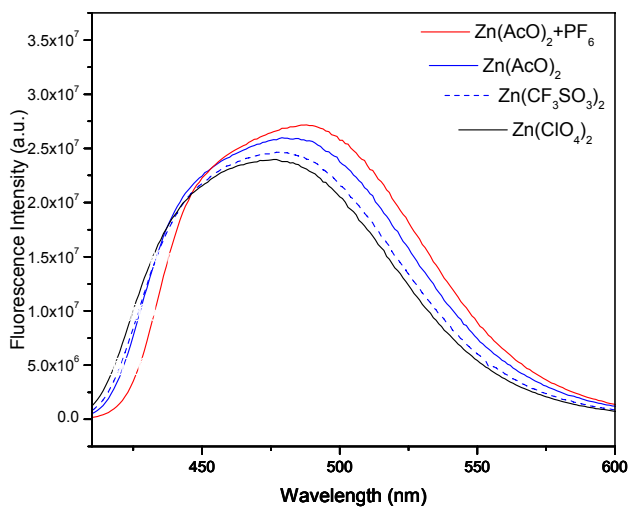

Figure S4. Effects of different counter ions ( $Y^-$ ) on the fluorescence of  $Zn_2L_2Y_2$  in THF.

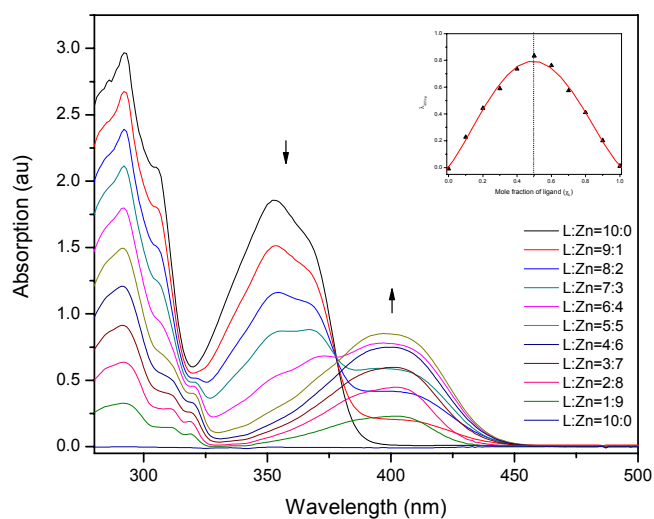

Figure S5. Job's titration plot of ligand **HL** in  $\text{CHCl}_3$  with  $\text{Zn}(\text{OAc})_2 \cdot 2\text{H}_2\text{O}$  in DMSO, showing the 1:1 ratio in the metal complex.

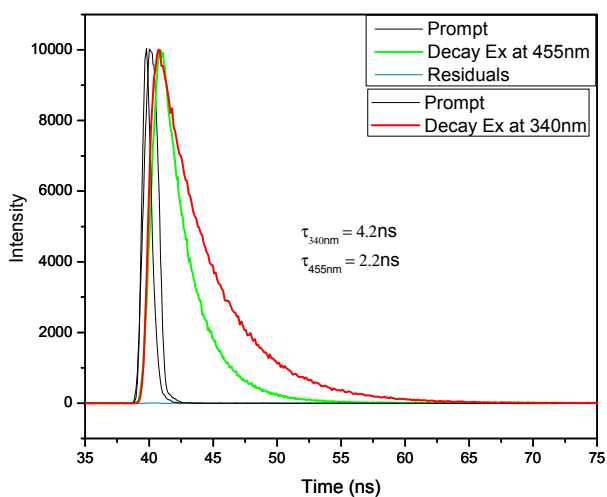

Figure S6. Time-domain of fluorescence decays of **5** in  $\text{CHCl}_3$  when excited at 340 and 455 nm.

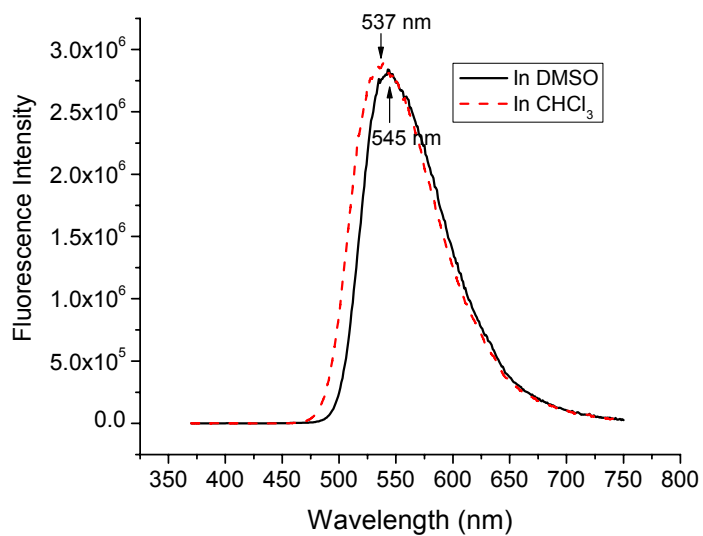

Figure S7. Fluorescence spectra of ligand in CHCl<sub>3</sub> ( $\lambda_{em}$ =537 nm) and in DMSO ( $\lambda_{em}$ =545 nm).
